# Supplementary material for: Effect of alkaline-earth species in phosphate glasses on the mobility of proton carriers
Source: Royal Society of Chemistry journal article supplement (doi:10.1039/c7ta01475a), 2017-01-01
Supplement: c7ta01475a1.pdf [file c7ta01475a1.pdf]

## Supplementary Information

### **Effect of alkaline-earth species in phosphate glasses on mobility of proton carriers**

Takuya Yamaguchi<sup>a,b</sup>, Yasuhisa Saito<sup>a</sup>, Yasutaka Kuwahara<sup>c</sup>, Hiromi Yamashita<sup>c</sup>, Tomohiro Ishiyama<sup>d</sup>, Junji Nishii<sup>e</sup>, Toshiharu Yamashita<sup>f</sup>, Hiroshi Kawazoe<sup>f</sup>, Takahisa Omata<sup>a,b,\*</sup>

<sup>a</sup> *Department of Environment Studies for Advanced Society, Graduate School of Environmental Studies, Tohoku University, 468-1 Aoba, Aramaki, Aoba-ku, Sendai 980-0845, Japan*

<sup>b</sup> *Institute of Multidisciplinary Research for Advanced Materials, IMRAM Tohoku University, Katahira 2-1-1, Aoba-ku, Sendai 980-8577, Japan*

<sup>c</sup> *Division of Materials and Manufacturing Science, Graduate School of Engineering, Osaka University, 2-1 Yamada-oka, Suita 565-0871, Japan*

<sup>d</sup> *Fuel Cell Materials Group, Research Institute for Energy Conservation, National Institute of Advanced Industrial Science and Technology (AIST), AIST Central 5, Higashi 1-1-1, Tsukuba, Ibaraki 305-8565, Japan*

<sup>e</sup> *Research Institute for Electronic Science, Hokkaido University, Kita 21 Nishi 10, Kita-ku, Sapporo 001-0021, Japan*

<sup>f</sup> *Kawazoe Frontier Technologies Corporation, Kuden-cho 931-113, Sakae-ku, Yokohama 247-0014, Japan*

\* Corresponding author. Tel. & Fax: +81-22-217-5832

e-mail: omata@tagen.tohoku.ac.jp

**Table S1** Glass transition temperatures,  $T_g$ , and glass deforming temperatures,  $T_d$ , of the Mg and Ba glasses before and after APS.

| Glass    | Before APS             |                        | After APS              |                        |
|----------|------------------------|------------------------|------------------------|------------------------|
|          | $T_g / ^\circ\text{C}$ | $T_d / ^\circ\text{C}$ | $T_g / ^\circ\text{C}$ | $T_d / ^\circ\text{C}$ |
| Mg glass | 402                    | 433                    | 191                    | 231                    |
| Ba glass | 370                    | 405                    | 163                    | 208                    |

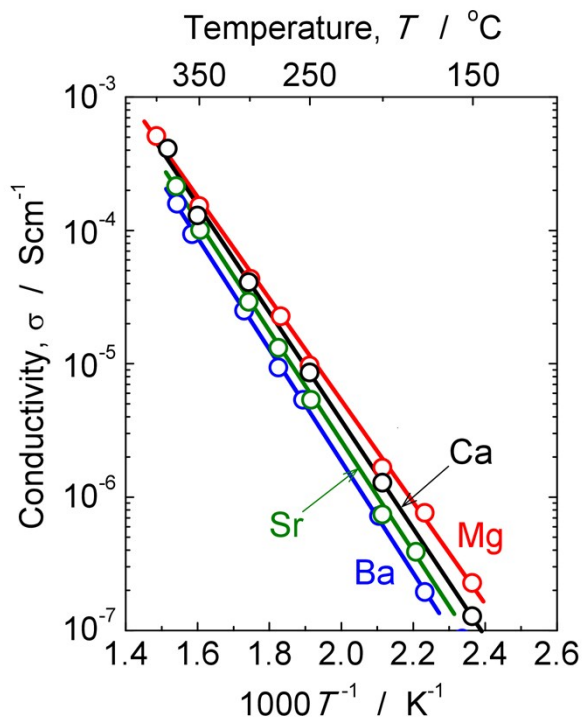

**Figure S1** Electrical conductivity of the glasses before APS. The red, green, black, and blue circles and lines represent data obtained for the Mg, Ca, Sr, and Ba glass, respectively.

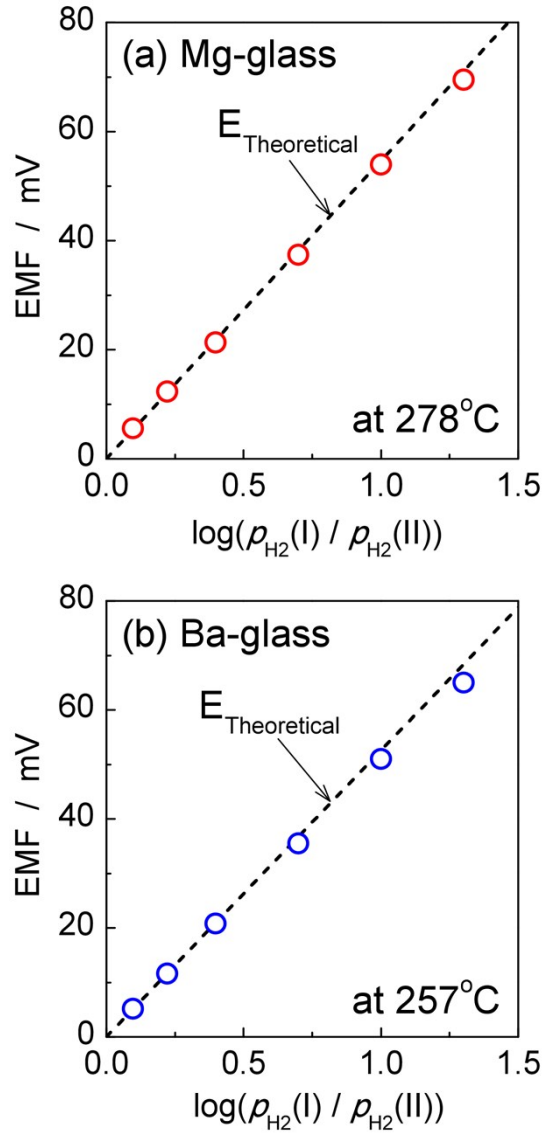

**Figure S2** Emf as a function of logarithmic  $p_{\text{H}_2}$  ratio of gas (I) to gas (II) of the hydrogen concentration cell measured at (a) 278 °C for the Mg glass and (b) 257 °C for the Ba glass. Gas (I) was constant at 100%  $\text{H}_2$  gas. The dashed black line represents the theoretical emf determined

using the Nernst equation,  $E = \frac{RT}{2F} \ln \left( \frac{p_{\text{H}_2}(\text{I})}{p_{\text{H}_2}(\text{II})} \right)$ .
